# Supplementary material for: NK Cells Stimulate Recruitment of cDC1 into the Tumor Microenvironment Promoting Cancer Immune Control
Source: PubMed Central journal article supplement (PMC5847168; doi:10.1016/j.cell.2018.01.004), 2018-02-22
Supplement: mmc1.pdf [file mmc1.pdf]

**Cell, Volume 172**

**Supplemental Information**

**NK Cells Stimulate Recruitment of cDC1**

**into the Tumor Microenvironment**

**Promoting Cancer Immune Control**

**Jan P. Böttcher, Eduardo Bonavita, Probir Chakravarty, Hanna Bles, Mar Cabeza-Cabrerizo, Stefano Sammiceli, Neil C. Rogers, Erik Sahai, Santiago Zelenay, and Caetano Reis e Sousa**

|             | cDC1 signature           |                                   | NK cell signature        |                                   | CLEC9A                   |                                   |
|-------------|--------------------------|-----------------------------------|--------------------------|-----------------------------------|--------------------------|-----------------------------------|
|             | HR<br>[95% CI]           | Median survival ratio<br>[95% CI] | HR<br>[95% CI]           | Median survival ratio<br>[95% CI] | HR<br>[95% CI]           | Median survival ratio<br>[95% CI] |
| <b>SKCM</b> | 0.5395 [0.3706 - 0.7853] | 1.93 [1.323 - 2.815]              | 0.4874 [0.3292 - 0.7216] | 2.549 [1.727 - 3.761]             | 0.3987 [0.2714 - 0.5855] | 3.789 [2.584 - 5.558]             |
| <b>BRCA</b> | 0.561 [0.3691 - 0.8526]  | 1.125 [0.7323 - 1.728]            | 0.6006 [0.3935 - 0.9165] | 0.9821 [0.6342 - 1.521]           | 0.6168 [0.4006 - 0.9499] | 1.125 [0.7275 - 1.739]            |
| <b>HNSC</b> | 0.5077 [0.3439 - 0.7496] | 1.68 [1.137 - 2.483]              | 0.6198 [0.432 - 0.8892]  | 1.983 [1.379 - 2.851]             | 0.4881 [0.3305 - 0.721]  | 1.68 [1.125 - 2.51]               |
| <b>LUAD</b> | 0.4867 [0.3226 - 0.7341] | 1.693 [1.098 - 2.612]             | 0.5776 [0.3855 - 0.8654] | 1.533 [1.006 - 2.334]             | 0.6206 [0.4143 - 0.9298] | 1.412 [0.9406 - 2.119]            |

**Table S1. Related to Figure 7. Prognostic value of cDC1-specific genes and NK cell specific genes for survival of human cancer patients.**

Patient data were ordered according to the sum ranked expression levels gene signatures containing cDC1, NK cell specific transcripts or the transcript levels of *CLEC9A*. Top and bottom quartiles of ordered patient data were compared for overall survival. Hazard ratio (HR) and Median survival ratio for top/bottom quartiles are shown. CI: confidence interval.
